# Supplementary material for: Long-term Safety and Efficacy of Esketamine Nasal Spray Plus an Oral Antidepressant in Patients with Treatment-resistant Depression– an Asian Sub-group Analysis from the SUSTAIN-2 Study
Source: PubMed Central journal article supplement — Clin Psychopharmacol Neurosci. 2022 Feb 28;20(1):70–86. doi: 10.9758/cpn.2022.20.1.70 (PMC8813327; doi:10.9758/cpn.2022.20.1.70), 2022-02-28
Supplement: cpn-20-1-70-supple.pdf [file cpn-20-1-70-supple.pdf]

**Supplementary Material 1.** Institutional Review Boards (IRBs) or Independent Ethics Committees (IECs) approval numbers relevant to Asian sub-group analysis

| Country     | Approval no. for original protocol                                                       | Approval no. for protocol-amd1                                                                                                                                                                                                                                | Approval no. for protocol-amd2                                                                                                                             | Approval no. for protocol-amd3 | Approval no. for protocol-amd4                                                                                                                               |
|-------------|------------------------------------------------------------------------------------------|---------------------------------------------------------------------------------------------------------------------------------------------------------------------------------------------------------------------------------------------------------------|------------------------------------------------------------------------------------------------------------------------------------------------------------|--------------------------------|--------------------------------------------------------------------------------------------------------------------------------------------------------------|
| Malaysia    | Central EC - MY10001/-002/-004/-006: NMRR-15-996-26620<br>Local EC - MY10005: 20157-1527 |                                                                                                                                                                                                                                                               |                                                                                                                                                            |                                |                                                                                                                                                              |
| South Korea | N/A                                                                                      | Local IRB: <ul style="list-style-type: none"> <li>• KR10001 (H-1507-119-690)</li> <li>• KR10003 (CNUH-2015-166)</li> <li>• KR10004 (AS15117)</li> <li>• KR10005 (ED15173)</li> <li>• KR10006 (SMC 2015-07-18)</li> <li>• KR10008 (IRB no. 1536-01)</li> </ul> |                                                                                                                                                            |                                |                                                                                                                                                              |
| Taiwan      | NA                                                                                       | TW10001:<br>1044900608<br>TW10002:<br>1040008124<br>TW10003/TW10005:<br>(104) IRB-314<br>TW10004: 2015/8/31<br>TW10006:<br>1050003808<br>TW10007:<br>NA (PA1 was not submitted to IRB of TW10007)                                                             | TW10001:<br>1054901609<br>TW10002:<br>1050005414<br>TW10003/TW10005:<br>(105) IRB-266<br>TW10004: 2016/6/8<br>TW10006:<br>1050004752<br>TW10007: 2016/9/13 | NA                             | TW10001:<br>1054903929<br>TW10002:<br>1050013135<br>TW10003/TW10005:<br>(105) IRB-676<br>TW10004: 2016/12/6<br>TW10006:<br>1050009467<br>TW10007: 2016/11/23 |
